# Supplementary material for: A promising PMHS/PEO blend polymer electrolyte for all-solid-state lithium ion batteries
Source: Royal Society of Chemistry journal article supplement (doi:10.1039/c8dt02904k), 2018-01-01
Supplement: c8dt02904k1.pdf [file c8dt02904k1.pdf]

## Supporting information

### **A promising PMHS/PEO blend polymer electrolyte for all-solid-state lithium ion batteries**

Yi-Jing Li<sup>a</sup>, Chao-Ying Fan<sup>a,b</sup>, Jing-Ping Zhang<sup>\*a</sup> and Xing-Long Wu<sup>\*a,b</sup>

*a Faculty of Chemistry, National & Local United Engineering Laboratory for Power Batteries, Northeast Normal University, Changchun, Jilin 130024, China*

*b Key Laboratory for UV Light-Emitting Materials and Technology Northeast Normal University, Ministry of Education Changchun, Jilin 130024, P. R. China*

\* Corresponding authors. *E-mail: jpzhang@nenu.edu.cn; xinglong@nenu.edu.cn*

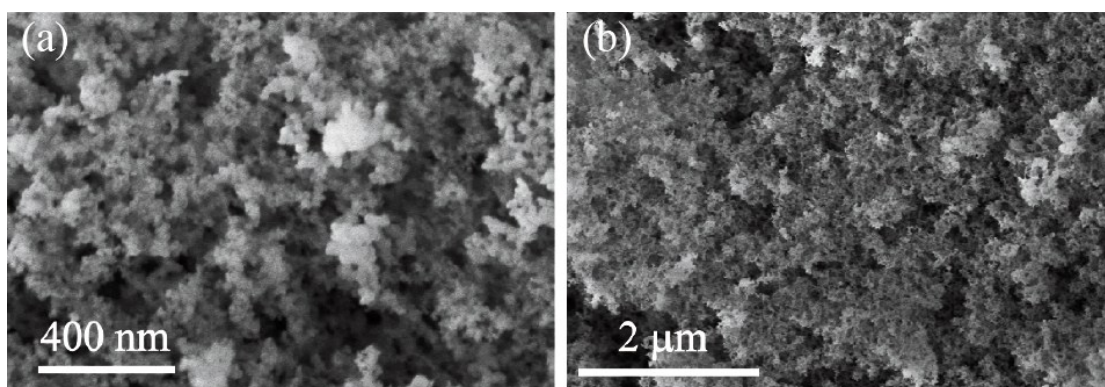

Fig. S1 SEM images of SiO<sub>2</sub>.

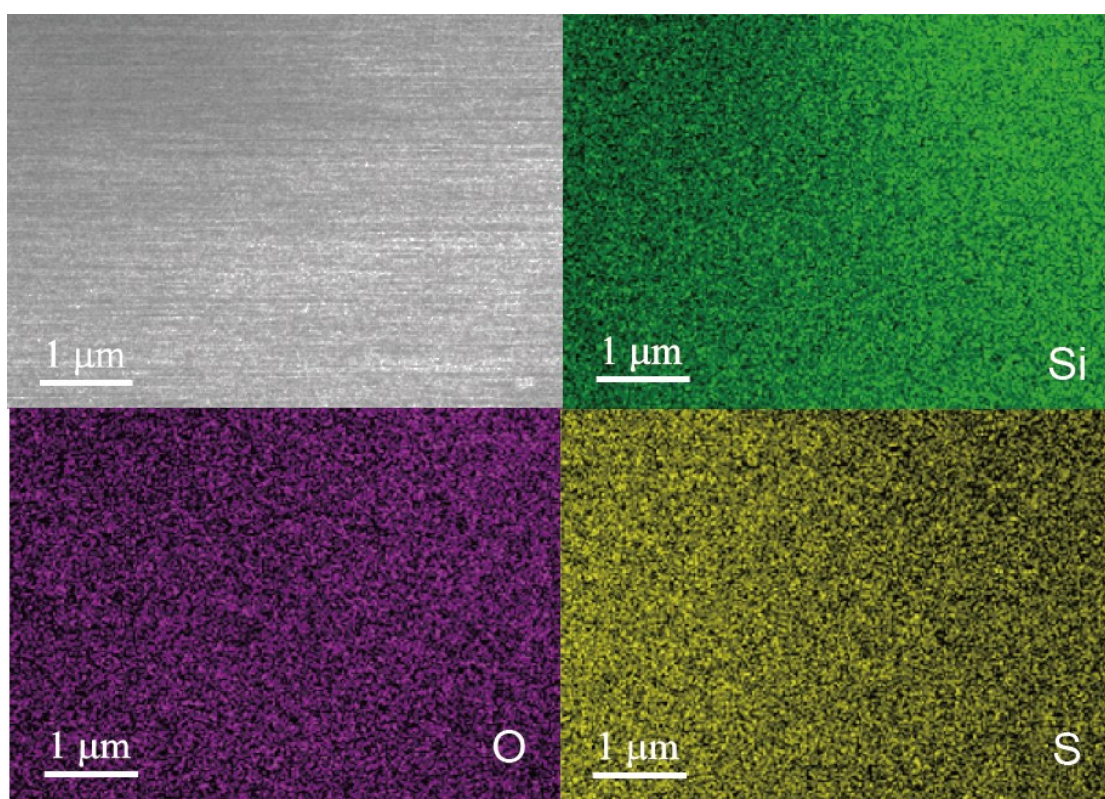

Fig. S2 SEM images and EDX spectra for the surface of PPS-CPE.

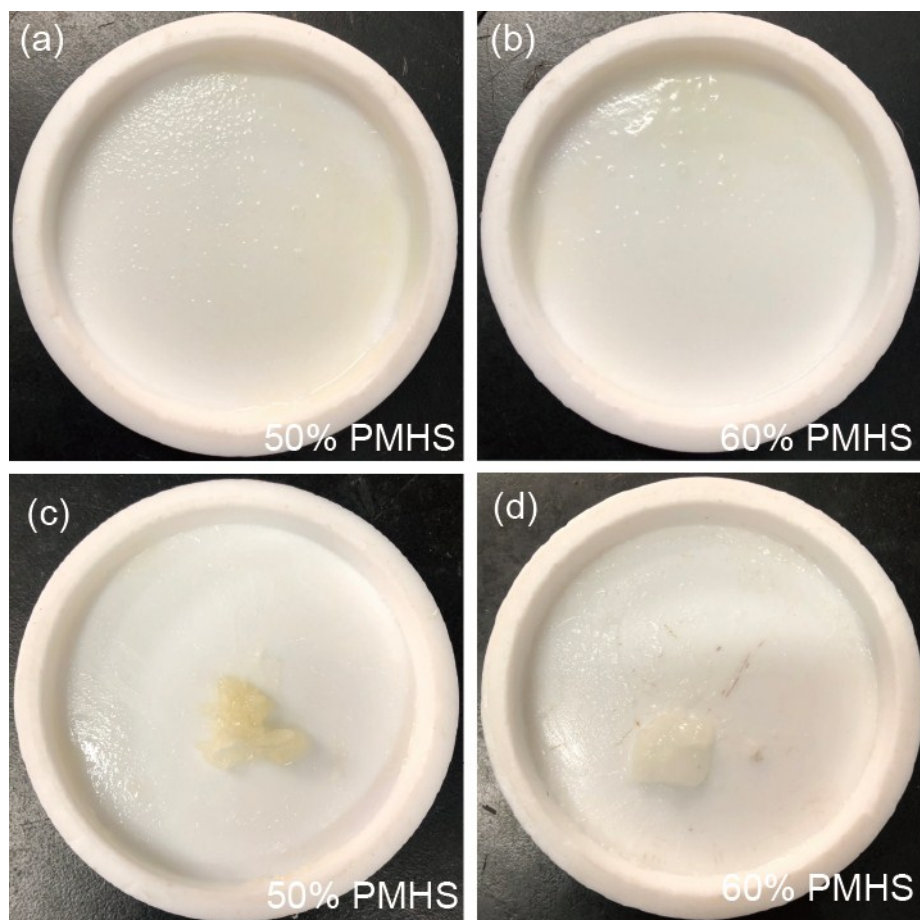

Fig. S3 Digital photos of PPS-CPE with different ratios of PMHS. (a, b) are the initial state when PPS-CPE is produced, and (c, d) are the aggregation state of PPS-CPE.

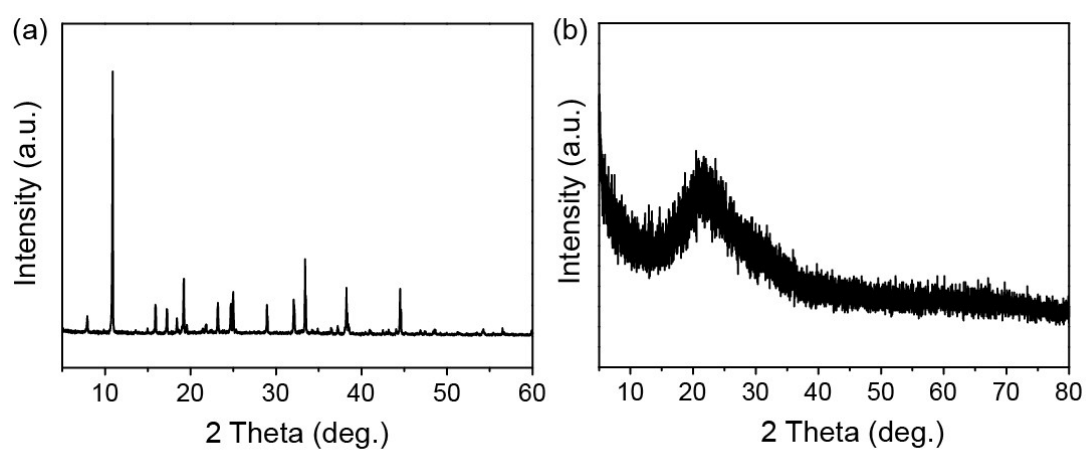

Fig. S4 XRD patterns of LiTFSI (a) and SiO<sub>2</sub> (b).

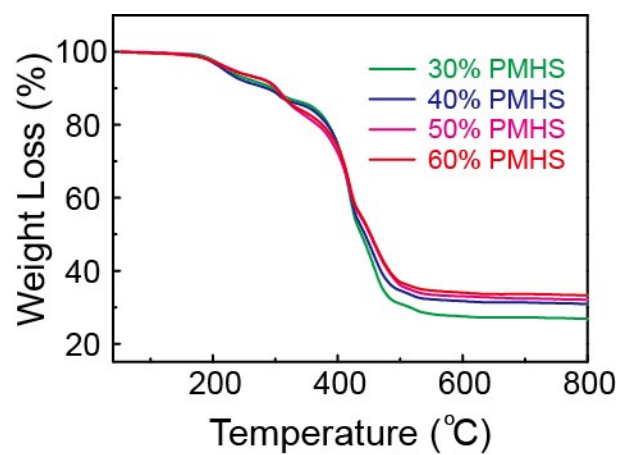

Fig. S5 TGA curves for pure PEO and PPS-CPE films with differently contents of PHMS under air temperature at a heating rate of  $10\text{ }^{\circ}\text{C min}^{-1}$ .

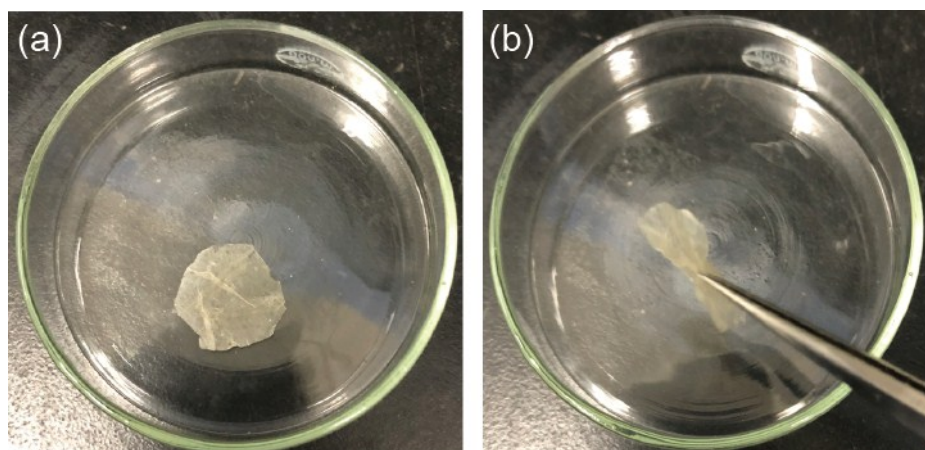

Fig. S6 Digital photograph of PPS-CPE at  $60\text{ }^{\circ}\text{C}$ .

Table S1. Composition of PPS-CPE material

|              | PMHS(g) | SiO <sub>2</sub> (g) | PEO(g) | LiTFSI(g) |
|--------------|---------|----------------------|--------|-----------|
| PPS-CPE(30%) | 0.3     | 0.025                | 0.7    | 0.3       |
| PPS-CPE(40%) | 0.4     | 0.025                | 0.7    | 0.3       |
| PPS-CPE(50%) | 0.5     | 0.025                | 0.7    | 0.3       |
| PPS-CPE(60%) | 0.6     | 0.025                | 0.7    | 0.3       |
